# Supplementary material for: Association of Power Outage With Mortality and Hospitalizations Among Florida Nursing Home Residents After Hurricane Irma
Source: PubMed Central journal article supplement (PMC8796882; doi:10.1001/jamahealthforum.2021.3900), 2021-11-24
Supplement: jamahealthforum-e213900-s001.pdf [file jamahealthforum-e213900-s001.pdf]

## Supplemental Online Content

Skarha J, Gordon L, Sakib N, et al. Association of power outage with mortality and hospitalizations among Florida nursing home residents after Hurricane Irma. *JAMA Health Forum*. 2021;2(11):e213900. doi:10.1001/jamahealthforum.2021.3900

**eFigure 1.** Direct Acyclic Graph (DAG) for the relations between power loss, first hospitalization and mortality, and covariates

**eFigure 2.** Daily mortality rate of NH residents that experienced a power loss and daily mortality rate of NH residents that did not experience power loss over a 7-day period

**eTable.** Unadjusted and adjusted odds ratio from mixed effects model of first hospitalization within 30 days or mortality within 7 and 30 days among NH residents that experienced a power loss after Hurricane Irma compared to residents that did not experience a power loss

This supplemental material has been provided by the authors to give readers additional information about their work.

**eFigure 1: Direct Acyclic Graph (DAG) for the relations between power loss, first hospitalization and mortality, and covariates**

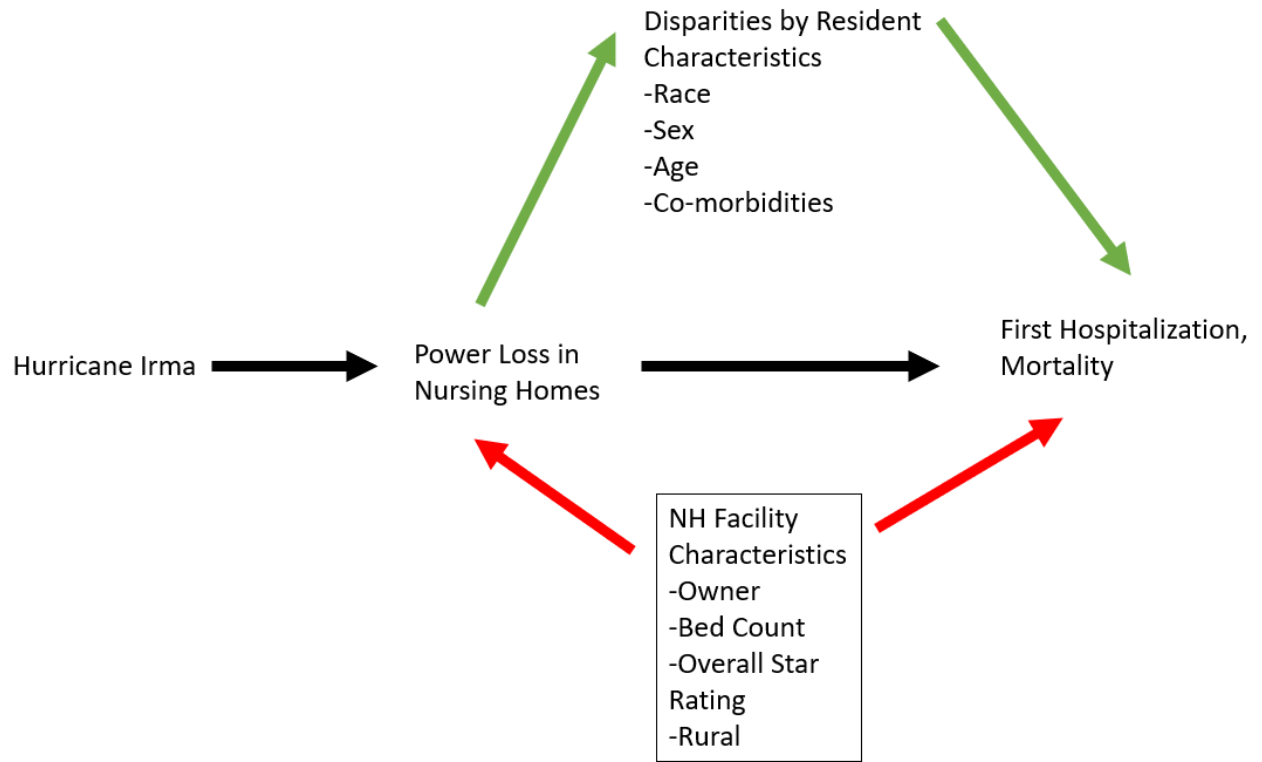

**eFigure 2: Daily mortality rate of NH residents comparing those that experienced a power loss and those that did not over a 7-day period**

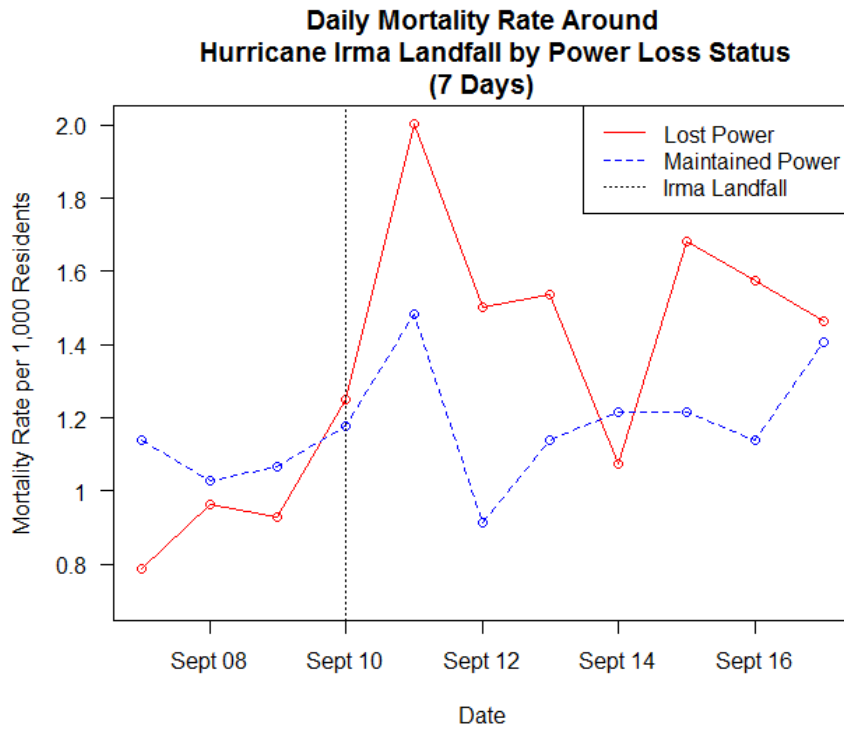

**eTable: Unadjusted and adjusted odds ratio from mixed effects model of first hospitalization within 30 days or mortality within 7 and 30 days among NH residents that experienced a power loss after Hurricane Irma compared to residents that did not experience a power loss<sup>a,b</sup>**

|                                      | Unadjusted Odds Ratio<br>95% CI | Adjusted Odds Ratio<br>95% CI |
|--------------------------------------|---------------------------------|-------------------------------|
| First Hospitalization within 30 days | 1.03 (0.94, 1.12)               | 1.05 (0.96, 1.14)             |
| Mortality within 7 days              | 1.24 (1.05, 1.47)               | 1.24 (1.05, 1.47)             |
| Mortality within 30 days             | 1.09 (1.00, 1.21)               | 1.12 (1.02, 1.23)             |

<sup>a</sup>We used penalized quasilikelihood (PQL) Estimation of Generalized Linear Mixed Models with a random effect for nursing home ID.

<sup>b</sup>We adjusted for nursing home owner status (For-profit, Not-for-profit, Government-run), continuous bed count of nursing home beds, overall nursing home star rating (1-5), and rural county indicator.
